# Supplementary material for: Evaluation of Early Response to Treatment of Hepatocellular Carcinoma with Yttrium-90 Radioembolization Using Quantitative Computed Tomography Analysis
Source: PubMed Central journal article supplement — Korean J Radiol. 2019 Feb 19;20(3):449–58. doi: 10.3348/kjr.2018.0469 (PMC6389807; doi:10.3348/kjr.2018.0469), 2019-02-19
Supplement: kjr-20-449-s002.pdf [file kjr-20-449-s002.pdf]

## SUPPLEMENTARY MATERIALS 2

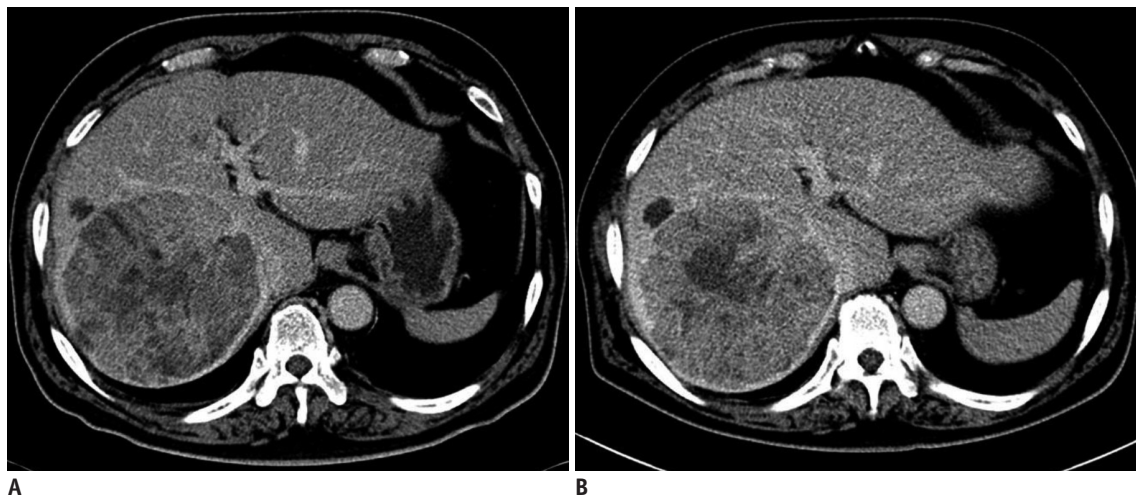

**Fig. 1. Liver CT images of 66-year-old man with HCC before TARE (A) and 27 days after TARE (B).** Necrotic area was measured as 13.3 cm<sup>2</sup> before procedure, but necrotic area decreased to 8.8 cm<sup>2</sup> after procedure. pNI measured as -34% ( $pNI = [8.8 - 13.3] / 13.3 = -34\%$ ). Necrotic areas before treatment were contrast pooled at delayed phase after treatment and observed with higher delayed enhancement. pNI = percentage increase in necrotic area
